# Supplementary material for: Sensitivity and breadth of detection of high-throughput sequencing for adventitious virus detection
Source: PubMed Central journal article supplement (PMC7368052; doi:10.1038/s41541-020-0207-4), 2020-07-17
Supplement: 41541_2020_207_MOESM1_ESM.pdf [file 41541_2020_207_MOESM1_ESM.pdf]

## Supplementary information

### Supplementary Note 1

#### Nucleic acid recovery

##### *Viral vaccine crude harvest*

The nucleic acids recovered were 60–137  $\text{pg } \mu\text{L}^{-1}$  and the library concentration range was 2.8–4.5  $\text{ng mL}^{-1}$ .

##### *Cell substrate matrix*

Nucleic acid recovery was 4.5–6.6  $\text{ng } \mu\text{L}^{-1}$  and the Library concentration range was 2.4–3.0  $\text{ng } \mu\text{L}^{-1}$ .

1 **Supplementary Table 1: The World Health Organization and European pharmacopeia**  
 2 **recommendations for new methods to detect adventitious agents**

| Reference                                                                                                                                                                               | Recommendation                                                                                                                                                                                                                                                                                                                                                                                                                                                                                                                                                                                                                                                                                                                                                                                                                                                                                                                                                                                                                                 |
|-----------------------------------------------------------------------------------------------------------------------------------------------------------------------------------------|------------------------------------------------------------------------------------------------------------------------------------------------------------------------------------------------------------------------------------------------------------------------------------------------------------------------------------------------------------------------------------------------------------------------------------------------------------------------------------------------------------------------------------------------------------------------------------------------------------------------------------------------------------------------------------------------------------------------------------------------------------------------------------------------------------------------------------------------------------------------------------------------------------------------------------------------------------------------------------------------------------------------------------------------|
| WHO TRS 978 Annex 3 - Cell substrates: <sup>1</sup>                                                                                                                                     | "New and sensitive molecular methods with broad detection capabilities are being developed. These are not yet in routine use but, as they become widely available and validated, they will play an increasing role in the evaluation of cell substrates. The sensitivity of these methods, as well as their breadth of detection, should be considered when evaluating their applicability."                                                                                                                                                                                                                                                                                                                                                                                                                                                                                                                                                                                                                                                   |
| WHO TRS 978 Annex 5: Live Attenuated Yellow Fever: <sup>1</sup>                                                                                                                         | "New molecular methods with broad detection capabilities are being developed for the detection of adventitious agents. These methods include: degenerate NAT for whole virus families with analysis of the amplicons by hybridisation, sequencing or mass spectrometry; NAT with random primers followed by analysis of the amplicons on large oligonucleotide microarrays of conserved viral sequencing or digital subtraction of expressed sequences; and high-throughput sequencing. These methods may be used in the future to supplement existing methods, or as alternative methods to both <i>in vivo</i> and <i>in vitro</i> tests, after appropriate validation and approval by the NRA. "<br>same paragraph in WHO TRS 979 Annex 2 (Live attenuated Dengue Vaccine)                                                                                                                                                                                                                                                                  |
| Ph. Eur 5.2.3: "Cell Substrates for the production of vaccines for human use", version 9:0 and updated version 9.3 in July 2017, revision <sup>2</sup>                                  | "New molecular methods with broad detection capabilities are being developed for the detection of adventitious agents. These methods include: degenerate NAT for whole virus families with analysis of the amplicons by hybridisation, sequencing or mass spectrometry; NAT with random primers followed by analysis of the amplicons on large oligonucleotide microarrays of conserved viral sequencing or digital subtraction of expressed sequences; and high-throughput sequencing. These methods may be used in the future to supplement existing methods, or as alternative methods to both <i>in vivo</i> and <i>in vitro</i> tests, after appropriate validation and approval by the NRA."                                                                                                                                                                                                                                                                                                                                             |
| Ph. Eur. 5.2.14: "Substitution of <i>in vivo</i> method(s) by <i>in vitro</i> method(s) for the quality control of vaccines", version 9.3 published in July 2017, creation <sup>3</sup> | <u>Detection of viral extraneous agents by novel molecular methods:</u> Detection of viral extraneous agents in cell banks, seed lots and cell culture harvests is currently conducted using a panel of <i>in vivo</i> and <i>in vitro</i> methods at different stages of the manufacturing process. Novel, sensitive molecular techniques with broad detection capabilities are available, including deep sequencing or high throughput sequencing methods, degenerate PCR for whole virus families or random-priming methods (associated or not with sequencing), hybridisation to oligonucleotide arrays and mass spectrometry. The use of these new broad molecular methods has highlighted the gaps with the existing testing strategy by identifying previously undetected viral contaminants in final product, the cell banks from which it was produced and intermediate manufacturing stages. These new broad molecular methods (e.g. deep sequencing or high throughput sequencing) detect genomes while the existing <i>in vivo</i> |

methods are based on observations of the effects viruses have on experimental animals. The implementation of such new broad molecular methods as substitutes for *in vivo* methods requires a comparison of the specificity (breadth of detection) and the sensitivity of the new and existing methods. For this purpose, an appropriate panel of representative well-characterised model viruses should be used to assess the ability of the new method to detect viruses that are (or are not) detected by the *in vivo* methods and, to determine if the sensitivity is at least equivalent to the sensitivity of the *in vivo* methods. This last element is particularly complex since these new molecular methods do not detect the same characteristic of the viral contaminant (genome for molecular methods versus infectious virus for *in vivo* methods), and also the fact that no or limited validation data exist for the *in vivo* methods. It should be also emphasised that the outcome of the broad molecular methods is not the final result since the detection of a genome or fragments of a genome does not necessarily indicate the presence of an infectious virus.”

Ph. Eur. 2.6.16: “Tests for extraneous agents in viral vaccines for human use”, version 9.3 published in July 2017, revision. Corrected version in Supplement 9.4<sup>4</sup>

“New molecular methods with broad detection capabilities are being developed for the detection of adventitious agents. These methods include: degenerate NAT for whole virus families with analysis of the amplicons by hybridisation, sequencing or mass spectrometry; NAT with random primers followed by analysis of the amplicons on large oligonucleotide microarrays of conserved viral sequencing or digital subtraction of expressed sequences; and high-throughput sequencing. These methods may be used in the future to supplement existing methods, or as alternative methods to both *in vivo* and *in vitro* tests, after appropriate validation and approval by the NRA.”

4 **Supplementary Table 2: NIH Model Viruses**

| Viral Family and virus            | Strain           | Enveloped | Viral genome | Genome Size (Kb) | Production Cell Line |
|-----------------------------------|------------------|-----------|--------------|------------------|----------------------|
| <i>Adenoviridae</i>               |                  |           |              |                  |                      |
| Adenovirus 5                      | Adenoid 75       | No        | dsDNA        | 36               | A549                 |
| Adenovirus 41                     | N/A              | No        | dsDNA        | 34               | HEK293               |
| <i>Flaviviridae</i>               |                  |           |              |                  |                      |
| Bovine Viral Diarrhea Virus       | NY-1             | Yes       | ssRNA (+ve)  | 12.4             | BT                   |
| <i>Herpesviridae</i>              |                  |           |              |                  |                      |
| Herpes Simplex Virus Type 1       | MacIntyre        | Yes       | dsDNA        | 150              | Vero                 |
| Simian Cytomegalovirus            | CS6              | Yes       | dsDNA        | 221              | MRC-5                |
| <i>Orthomyxoviridae</i>           |                  |           |              |                  |                      |
| Influenza A Virus                 | A/PR/8/34 (H1N1) | Yes       | ssRNA (-ve)  | 12.5             | MDCK                 |
| <i>Paramyxoviridae</i>            |                  |           |              |                  |                      |
| Bovine Parainfluenza Virus Type 3 | N/A              | Yes       | ssRNA (-ve)  | 15.5             | Vero                 |
| Measles Morbillivirus             | Edmonston        | Yes       | ssRNA (-ve)  | 15.9             | Vero                 |
| Mumps Virus                       | Enders           | Yes       | ssRNA (-ve)  | 15.4             | Vero                 |
| <i>Picornaviridae</i>             |                  |           |              |                  |                      |
| Coxsackie virus A16               | N/A              | No        | ssRNA (+ve)  | 7.4              | Vero                 |
| Coxsackie virus B3                | N/A              | No        | ssRNA (+ve)  | 7.4              | LLC-MK2              |
| Echovirus 11                      | Gregory          | No        | ssRNA (+ve)  | 7.4              | LLC-MK2              |
| Rhinovirus 2                      | HGP              | No        | ssRNA (+ve)  | 7.1              | HeLa                 |
| <i>Polyomaviridae</i>             |                  |           |              |                  |                      |
| Simian Virus 40                   | Pa-57            | No        | dsDNA        | 5.2              | Vero                 |
| <i>Rhabdoviridae</i>              |                  |           |              |                  |                      |
| Vesicular Stomatitis Virus        | Indiana          | Yes       | ssRNA(-ve)   | 11.2             | Vero                 |
| <i>Togaviridae</i>                |                  |           |              |                  |                      |
| Rubella Virus                     | M-33             | Yes       | ssRNA (+ve)  | 9.7              | BSC-1                |

5 ds, double stranded; NIH, National Institutes of Health; ss, single stranded.

6

7 **Supplementary Table 3: Genome copy number as determined by Clean Cells<sup>†</sup> for the NIH Stock**

| Lot #                                   |                | NIH Stock for Seed                                           |                                                                         |                         | Clean Cells Production                                      |                         |
|-----------------------------------------|----------------|--------------------------------------------------------------|-------------------------------------------------------------------------|-------------------------|-------------------------------------------------------------|-------------------------|
|                                         |                | NIH Titer<br>TCID <sub>50</sub> mL <sup>-1*</sup>            | Clean Cells<br>Titer<br>TCID <sub>50</sub> mL <sup>-1*</sup>            | Genome<br>copies per mL | Infectious<br>Titer<br>TCID <sub>50</sub> mL <sup>-1*</sup> | Genome<br>copies per mL |
| <i>Adenoviridae</i>                     |                |                                                              |                                                                         |                         |                                                             |                         |
| Adenovirus 5                            | SP-NIH-AD5-01  | 3.0 x 10 <sup>8</sup><br>(Day 7)                             | 4.27 x 10 <sup>7</sup><br>(Day 7)<br>2.95 x 10 <sup>9</sup><br>(Day 12) | 2.56 x 10 <sup>10</sup> | 2.95 x 10 <sup>7</sup><br>(Day 12)                          | 4.83 x 10 <sup>8</sup>  |
| Adenovirus 41                           | SP-NIH-AD41-01 | 2.0 x 10 <sup>5</sup>                                        | 9.33 x 10 <sup>5</sup>                                                  | 1.43 x 10 <sup>11</sup> | 1.74 x 10 <sup>5</sup>                                      | 1.41 x 10 <sup>10</sup> |
| <i>Flaviviridae</i>                     |                |                                                              |                                                                         |                         |                                                             |                         |
| Bovine Viral<br>Diarrhea Virus          | SP-NIH-BVDV-01 | 3.0 x 10 <sup>7</sup><br>FAID <sub>50</sub> mL <sup>-1</sup> | 4.68 x 10 <sup>7</sup>                                                  | 3.39 x 10 <sup>8</sup>  | 7.76 x 10 <sup>7</sup>                                      | 3.69 x 10 <sup>8</sup>  |
| <i>Herpesviridae</i>                    |                |                                                              |                                                                         |                         |                                                             |                         |
| Herpes Simplex<br>Virus Type 1          | SP-NIH-HSV1-01 | 9.5 x 10 <sup>6</sup><br>PFU mL <sup>-1</sup>                | 1.82 x 10 <sup>6</sup><br>PFU mL <sup>-1</sup>                          | 3.23 x 10 <sup>9</sup>  | 5.50 x 10 <sup>6</sup><br>PFU mL <sup>-1</sup>              | 3.88 x 10 <sup>8</sup>  |
| Simian<br>Cytomegalovirus               | SP-NIH-SCMV-05 | 3.0 x 10 <sup>4</sup>                                        | 1.35 x 10 <sup>3</sup>                                                  | 3.28 x 10 <sup>6</sup>  | 9.33 x 10 <sup>5</sup>                                      | 5.44 x 10 <sup>7</sup>  |
| <i>Orthomyxoviridae</i>                 |                |                                                              |                                                                         |                         |                                                             |                         |
| Influenza A Virus                       | SP-NIH-Flu-01  | 6.3 x 10 <sup>7</sup>                                        | 2.95 x 10 <sup>7</sup>                                                  | 3.44 x 10 <sup>8</sup>  | 2.57 x 10 <sup>4</sup>                                      | 6.21 x 10 <sup>6</sup>  |
| <i>Paramyxoviridae</i>                  |                |                                                              |                                                                         |                         |                                                             |                         |
| Bovine<br>Parainfluenza Virus<br>Type 3 | SP-NIH-BPI3-01 | 6.3 x 10 <sup>7</sup>                                        | 2.00 x 10 <sup>7</sup>                                                  | 8.67 x 10 <sup>7</sup>  | 8.13 x 10 <sup>7</sup>                                      | 1.57 x 10 <sup>8</sup>  |
| Measles<br>Morbillivirus                | SP-NIH-Mea-01  | 9.3 x 10 <sup>5</sup>                                        | 2.95 x 10 <sup>6</sup>                                                  | 4.00 x 10 <sup>8</sup>  | 9.33 x 10 <sup>6</sup>                                      | 3.25 x 10 <sup>8</sup>  |
| Mumps Virus                             | SP-NIH-Mum-01  | 1.3 x 10 <sup>6</sup>                                        | 2.95 x 10 <sup>6</sup>                                                  | 1.12 x 10 <sup>9</sup>  | 4.90 x 10 <sup>6</sup>                                      | 3.05 x 10 <sup>9</sup>  |
| <i>Picornaviridae</i>                   |                |                                                              |                                                                         |                         |                                                             |                         |
| Coxsackievirus, A16                     | SP-NIH-CAV-02  | 6.3 x 10 <sup>6</sup>                                        | 6.31 x 10 <sup>5</sup>                                                  | 1.91 x 10 <sup>10</sup> | 1.35 x 10 <sup>3</sup>                                      | 2.65 x 10 <sup>8</sup>  |
| Coxsackievirus B3                       | SP-NIH-CBV-01  | 3.0 x 10 <sup>7</sup>                                        | 4.27 x 10 <sup>7</sup>                                                  | 8.99 x 10 <sup>9</sup>  | 4.27 x 10 <sup>6</sup>                                      | 3.96 x 10 <sup>8</sup>  |
| Echovirus 11                            | SP-NIH-Echo-01 | 2.0 x 10 <sup>7</sup>                                        | 9.33 x 10 <sup>7</sup>                                                  | 6.92 x 10 <sup>9</sup>  | 1.20 x 10 <sup>8</sup>                                      | 3.56 x 10 <sup>9</sup>  |
| Rhinovirus 2                            | SP-NIH-Rhin-03 | 1.3 x 10 <sup>3</sup>                                        | 2.95 x 10 <sup>5</sup>                                                  | 1.09 x 10 <sup>10</sup> | 2.24 x 10 <sup>6</sup>                                      | 4.76 x 10 <sup>9</sup>  |
| <i>Polyomaviridae</i>                   |                |                                                              |                                                                         |                         |                                                             |                         |
| Simian Virus 40                         | SP-NIH-SV40-01 | 7.1 x 10 <sup>7</sup><br>PFU mL <sup>-1</sup>                | 6.92 x 10 <sup>7</sup><br>PFU mL <sup>-1</sup>                          | 4.14 x 10 <sup>11</sup> | 1.78 x 10 <sup>8</sup><br>PFU mL <sup>-1</sup>              | 3.76 x 10 <sup>11</sup> |
| <i>Rhabdoviridae</i>                    |                |                                                              |                                                                         |                         |                                                             |                         |
| Vesicular Stomatitis<br>Virus           | SP-NIH-VSV-02  | 1.0 x 10 <sup>9</sup><br>PFU mL <sup>-1</sup>                | 3.24 x 10 <sup>7</sup>                                                  | 1.28 x 10 <sup>9</sup>  | 9.12 x 10 <sup>8</sup>                                      | 3.14 x 10 <sup>9</sup>  |
| <i>Togaviridae</i>                      |                |                                                              |                                                                         |                         |                                                             |                         |
| Rubella Virus                           | SP-NIH-Rub-02  | 1.3 x 10 <sup>4</sup>                                        | 4.27 x 10 <sup>4</sup>                                                  | 2.45 x 10 <sup>7</sup>  | 8.71 x 10 <sup>4</sup>                                      | 1.72 x 10 <sup>7</sup>  |

8 \*All titers are expressed as TCID<sub>50</sub> mL<sup>-1</sup> unless otherwise indicated

9 † Clean Cells (<https://clean-cells.com/>) is a contract organization for Sanofi Pasteur

10 FAID, fluorescent antibody infectious dose; NIH, National Institutes of Health; PFU, plaque forming units; TCID, tissue culture infective dose

11

12 **Supplementary Table 4: Additional Sanofi Pasteur viruses to complement the NIH model viruses**

| Virus                     | Strain         | Enveloped | Viral genome | Genome size<br>(Kb) | Infectious titer<br>(log CCID <sub>50</sub> mL <sup>-1</sup> ) | Genome copies<br>per mL |
|---------------------------|----------------|-----------|--------------|---------------------|----------------------------------------------------------------|-------------------------|
| <i>Bornaviridae</i>       |                |           |              |                     |                                                                |                         |
| Human Borna Disease Virus | He/80/FR (BNV) | Yes       | ssRNA        | 8.9                 | -                                                              | 8.40 x 10 <sup>8</sup>  |
| <i>Coronaviridae</i>      |                |           |              |                     |                                                                |                         |
| Bovine Coronavirus        | C-197          | Yes       | ssRNA        | 31                  | -                                                              | 8.10 x 10 <sup>6</sup>  |
| <i>Herpesviridae</i>      |                |           |              |                     |                                                                |                         |
| Human Cytomegalovirus     | Towne          | Yes       | dsDNA        | 236                 | 7.85                                                           | 7.07 x 10 <sup>8</sup>  |
| <i>Parvoviridae</i>       |                |           |              |                     |                                                                |                         |
| Minute Virus of Mice      | Prototype      | No        | ssDNA        | 5.1                 | -                                                              | 1.59 x 10 <sup>12</sup> |
| Porcine Parvovirus        | NADL-2         | No        | ssDNA        | 5.1                 | -                                                              | 1.24 x 10 <sup>7</sup>  |
| <i>Reoviridae</i>         |                |           |              |                     |                                                                |                         |
| Reovirus Type 3           | Dearing        | No        | dsRNA        | 23.5                | -                                                              | 4.89 x 10 <sup>9</sup>  |

13 CCID<sub>50</sub>, cell culture infectious dose 50% i.e. the quantity of infectious virus that when inoculated into susceptible cell cultures will infect 50% of  
 14 the individual cultures

15 Viruses were obtained from the National Institutes of Health (NIH) National Institute of Allergy and Infectious Diseases (NIAID) and were made  
 16 available by Rebecca Sheets (based on the Gombold et al. publication<sup>5</sup>).

17 NIH, National Institutes of Health.

18

19 **Supplementary Table 5: Volume of each virus used to create the viral pool**

| Virus                             | Genome<br>copies per mL | Amount required<br>for 10 <sup>6</sup> genome<br>copies per mL | Additional<br>dilutions of the<br>viral stock | Final volume in spike<br>( $\mu$ L) |
|-----------------------------------|-------------------------|----------------------------------------------------------------|-----------------------------------------------|-------------------------------------|
| NIH model                         |                         |                                                                |                                               |                                     |
| <i>Adenoviridae</i>               |                         |                                                                |                                               |                                     |
| Adenovirus 5                      | 4.79 x 10 <sup>5</sup>  | 2.09                                                           | NA                                            | 2.09                                |
| Adenovirus 41                     | 1.41 x 10 <sup>7</sup>  | 0.0709                                                         | 1/100****                                     | 7.09                                |
| <i>Flaviviridae</i>               |                         |                                                                |                                               |                                     |
| Bovine Viral Diarrhea Virus       | 3.72 x 10 <sup>5</sup>  | 2.69                                                           | NA                                            | 2.69                                |
| <i>Herpesviridae</i>              |                         |                                                                |                                               |                                     |
| Herpes Simplex Virus Type 1       | 6.14 x 10 <sup>5</sup>  | 1.63                                                           | NA                                            | 1.63                                |
| Simian Cytomegalovirus            | 5.44 x 10 <sup>4</sup>  | 18.38                                                          | NA                                            | 18.38                               |
| <i>Orthomyxoviridae</i>           |                         |                                                                |                                               |                                     |
| Influenza A virus                 | 2.24 x 10 <sup>3</sup>  | 446.43                                                         | NA                                            | 446                                 |
| <i>Paramyxoviridae</i>            |                         |                                                                |                                               |                                     |
| Mumps Virus                       | 3.02 x 10 <sup>6</sup>  | 0.331                                                          | 1/10                                          | 3.31                                |
| Bovine Parainfluenza Virus Type 3 | 1.58 x 10 <sup>5</sup>  | 6.33                                                           | NA                                            | 6.33                                |
| Measles Morbillivirus             | 3.24 x 10 <sup>5</sup>  | 3.09                                                           | NA                                            | 3.09                                |
| <i>Picornaviridae</i>             |                         |                                                                |                                               |                                     |
| Coxsackie virus A16               | 2.65 x 10 <sup>5</sup>  | 3.77                                                           | NA                                            | 3.77                                |
| Coxsackie virus B3                | 3.96 x 10 <sup>5</sup>  | 2.53                                                           | NA                                            | 2.53                                |
| Echovirus 11                      | 3.55 x 10 <sup>6</sup>  | 0.282                                                          | 1/10                                          | 2.82                                |
| Rhinovirus 2                      | 4.76 x 10 <sup>6</sup>  | 0.21                                                           | 1/10                                          | 2.1                                 |
| <i>Polyomaviridae</i>             |                         |                                                                |                                               |                                     |
| Simian Virus 40                   | 3.80 x 10 <sup>8</sup>  | 0.00263                                                        | 1/1000***                                     | 2.63                                |
| <i>Rhabdoviridae</i>              |                         |                                                                |                                               |                                     |
| Vesicular Stomatitis Virus        | 3.16 x 10 <sup>6</sup>  | 0.316                                                          | 1/10                                          | 3.16                                |
| <i>Togaviridae</i>                |                         |                                                                |                                               |                                     |
| Rubella Virus                     | 1.72 x 10 <sup>4</sup>  | 58.14                                                          | NA                                            | 58.1                                |
| SP model                          |                         |                                                                |                                               |                                     |
| <i>Herpesviridae</i>              |                         |                                                                |                                               |                                     |
| Human Cytomegalovirus*            | 7.08 x 10 <sup>5</sup>  | 1.41                                                           | NA                                            | 1.41                                |
| <i>Reoviridae</i>                 |                         |                                                                |                                               |                                     |
| Reovirus Type 3                   | 4.89 x 10 <sup>6</sup>  | 0.204                                                          | 1/10                                          | 2.04                                |



*Parvoviridae*

|                      |                        |          |            |      |
|----------------------|------------------------|----------|------------|------|
| Minute Virus of Mice | 1.59 x 10 <sup>9</sup> | 0.000629 | 1/10 000** | 6.29 |
| Porcine Parvovirus   | 1.24 x 10 <sup>4</sup> | 80.65    | NA         | 80.6 |

*Coronaviridae*

|                    |                        |        |    |       |
|--------------------|------------------------|--------|----|-------|
| Bovine Coronavirus | 8.10 x 10 <sup>3</sup> | 123.46 | NA | 123.5 |
|--------------------|------------------------|--------|----|-------|

*Bornaviridae*

|                           |                        |      |    |      |
|---------------------------|------------------------|------|----|------|
| Human Borna Disease Virus | 8.40 x 10 <sup>5</sup> | 1.19 | NA | 1.19 |
|---------------------------|------------------------|------|----|------|

---

20 \* For human cytomegalovirus, it was estimated that there may be on average 10 times as many genome copies as the  
21 CCID50 value of 7.85 log CCID50 mL<sup>-1</sup>

22 \*\* 10 µL of the viral stock was mixed with 990 µL of Tris EDTA to create a 1/100 dilution. 10 µL of the diluted virus  
23 was mixed with 990 µL of Tris EDTA to achieve the final 1/10 000 dilution

24 \*\*\* 1 µL of the viral stock was mixed with 9 µL of Tris EDTA to create a 1/10 dilution. 10 µL of the diluted virus was  
25 mixed with 990 µL of Tris EDTA to achieve the final 1/1000 dilution

26 \*\*\*\* 10 µL of the viral stock was mixed with 990 µL of Tris EDTA to create a 1/100 dilution.

27 GC, Genome copy; NA, not applicable; NIH, National Institutes of Health; SP, Sanofi Pasteur.

28  
29

## Supplementary references

- 1 WHO TRS 978 Annex. Available at:  
[https://www.who.int/biologicals/vaccines/TRS\\_978\\_Annex\\_3.pdf?ua=1](https://www.who.int/biologicals/vaccines/TRS_978_Annex_3.pdf?ua=1). Last accessed July 2019.
- 2 Ph. Eur. Chapter 5.2.3: “Cell Substrates for the production of vaccines for human use”, version 9:0 and updated version 9.3 in July 2017, revision.
- 3 Ph. Eur. Chapter 5.2.14: “Substitution of in vivo method(s) by in vitro method(s) for the quality control of vaccines”, version 9.3 published in July 2017, creation.
- 4 Ph. Eur. Chapter 2.6.16: “Tests for extraneous agents in viral vaccines for human use”, version 9.3 published in July 2017, revision. Corrected version in Supplement 9.4.
- 5 Gombold, J. *et al.* Systematic evaluation of in vitro and in vivo adventitious virus assays for the detection of viral contamination of cell banks and biological products. *Vaccine* **32**, 2916-2926, doi:10.1016/j.vaccine.2014.02.021 (2014).
